# Supplementary material for: Targeted correction of megabase-scale CNTN6 duplication in induced pluripotent stem cells and impacts on gene expression
Source: PeerJ. 2025 Jan 20;13:e18567. doi: 10.7717/peerj.18567 (PMC11756360; doi:10.7717/peerj.18567)
Supplement: Supplemental Information 3 [file peerj-13-18567-s003.xlsx]

## Sheet: Лист1
Name	Desctiption	Sequense 5' -> 3'
gRNA	chr3:1,504,306-1,504,325	GAAGAAATATGATCTCTCGT
ssODN	red - homology arms; green - loxP site; black - HindIII site	AGTTTACATTGTTGTAGGTTGCCTCAGTGTCATACATTCCTCAGAATATTTTTACtCACGATAACTTCGTATAGCATACATTATACGAAGTTATAAGCTTAGAGATCATATTTCTTCTTTATATGAAGCACTGATGGATACAGTATCCATGAAAATAAGA
1_F	Detection of junction; expected product size 871bp	GTGCCTGACTTCCTAAGTGACA
1_R		TCTTGCAAGAGGACAGCTTTA
2,3_F	Detection of junction; expected product size 1329bp	CCAGGCAAAATCTGTGGCATGT
2,3_R		CAGACGAAAGCAAGCTCCAAGG
ACTB_F	ddPCR; an endogenous control gene	TCGTGCGTGACATTAAGGAG
ACTB_R		CTTCTCCAGGGAGGAGCTG
ACTB_P		FAM-CGCCCTGGACTTCGAGCAAGAGA-BHQ
CNTN6_F	ddPCR; to expression evaluation	CCAAGTGAACCATCAGAATTGTTAA
CNTN6_R		CCGACTTCCTCCACCTCCAT
CNTN6_P		HEX-AGCATCAGTCCCTGTTGTGGCACC-BHQ
CNTN6_ex6_nor_F	ddPCR; to evaluate alleles ratio in iPS cells from healthy donor	GGACCTTCAATGATAACCCCTTA
CNTN6_ex6_nor_R		GTTTCCCGTCTCTTGAGATACAA
CNTN6_ex6_nor_Pf		FAM-CGTCCAAGAGGACAATAGGCG-BHQ
hCNTN6_ex6_nor_P		HEX-CGTCCAAGAGGAAAATAGGCG-BHQ
CNTN6_ex6_dup_F	ddPCR; to evaluate alleles ratio in iPS cells from donor with CNTN6 duplication	GGACAATAGGCGATTTGTATCTC
CNTN6_ex6_dup_R		CCCACATCTGATGGTTCCAC
CNTN6_ex6_dup_Pf		FAM-AGACGGGAAACCTGTACATTGCC-BHQ
CNTN6_ex6_dup_Ph		HEX-AGACGGGAAACTTGTACATTGCC-BHQ
